# Supplementary material
Source: ML conference proceedings conference paper supplement (https://openaccess.thecvf.com/content/CVPR2022/html/Gao_Cross-Domain_Correlation_Distillation_CVPR_2022_paper.html)
Supplement: Supplementary file 1 [file Gao_Cross-Domain_Correlation_Distillation_CVPR_2022_supplemental.pdf]

# Cross-Domain Correlation Distillation for Unsupervised Domain Adaptation in Nighttime Semantic Segmentation

Huan Gao<sup>1</sup> Jichang Guo<sup>1\*</sup> Guoli Wang<sup>2</sup> Qian Zhang<sup>2</sup>

<sup>1</sup>School of Electrical and Information Engineering, Tianjin University.

<sup>2</sup>Horizon Robotics.

{gh99, jcguo}@tju.edu.cn, {guoli.wang, qian01.zhang}@horizon.ai

Table 1. Additional ablation studies of our proposed method on Dark Zurich-test set.

| Method                                          | mIoU        |
|-------------------------------------------------|-------------|
| RefineNet                                       | 28.5        |
| w/o project head and $L_{JS}$ in CDC            | 41.6        |
| w/o illuminance and inherent correlation in CDC | 43.8        |
| <b>Ours</b>                                     | <b>47.5</b> |

## 1. Experiments

### 1.1. Additional qualitative results

In Fig. 1 and Fig. 2, we show additional qualitative comparison results on Dark Zurich-val [1] and ACDC-night-val [2], respectively.

### 1.2. Generalization test

In Section 4.4 of our main paper, we provide comparison of model performance (mIoU) on BDD100K-night [3]. Here, we provide a qualitative comparison on BDD100K-night in Fig. 3. As can be seen from the Fig. 3, the nighttime illumination style of BDD100K-night is quite different from Dark Zurich and ACDC. Even in this case, our model can still obtain relatively satisfactory predictions.

### 1.3. Additional ablation study

Two other ablation experiments are performed in this section to further illustrate the effectiveness of our proposed component. The project head and  $L_{JS}$  ensure that the content information contained in the feature is extracted, and the illuminant and inherent correlation in  $L_{CDC}$  are designed for the process of transferring content knowledge and performing cross-domain content distillation. Table 1 reports the experimental results. The project head and  $L_{JS}$  are the guarantees for the effectiveness of CDC, so disabling

them causes a 5.9% mIoU decrease. After getting the content embedding, the combined effect of illumination and inherent correlation can boost the performance of the model, increasing the mIoU by 3.7%.

## References

- [1] Christos Sakaridis, Dengxin Dai, and Luc Van Gool. Guided curriculum model adaptation and uncertainty-aware evaluation for semantic nighttime image segmentation. In *Proceedings of the IEEE/CVF International Conference on Computer Vision*, pages 7374–7383, 2019. 1
- [2] Christos Sakaridis, Dengxin Dai, and Luc Van Gool. Acdc: The adverse conditions dataset with correspondences for semantic driving scene understanding. *arXiv preprint arXiv:2104.13395*, 2021. 1
- [3] Fisher Yu, Wenqi Xian, Yingying Chen, Fangchen Liu, Mike Liao, Vashisht Madhavan, and Trevor Darrell. Bdd100k: A diverse driving video database with scalable annotation tooling. *arXiv preprint arXiv:1805.04687*, 2(5):6, 2018. 1

\*Corresponding author

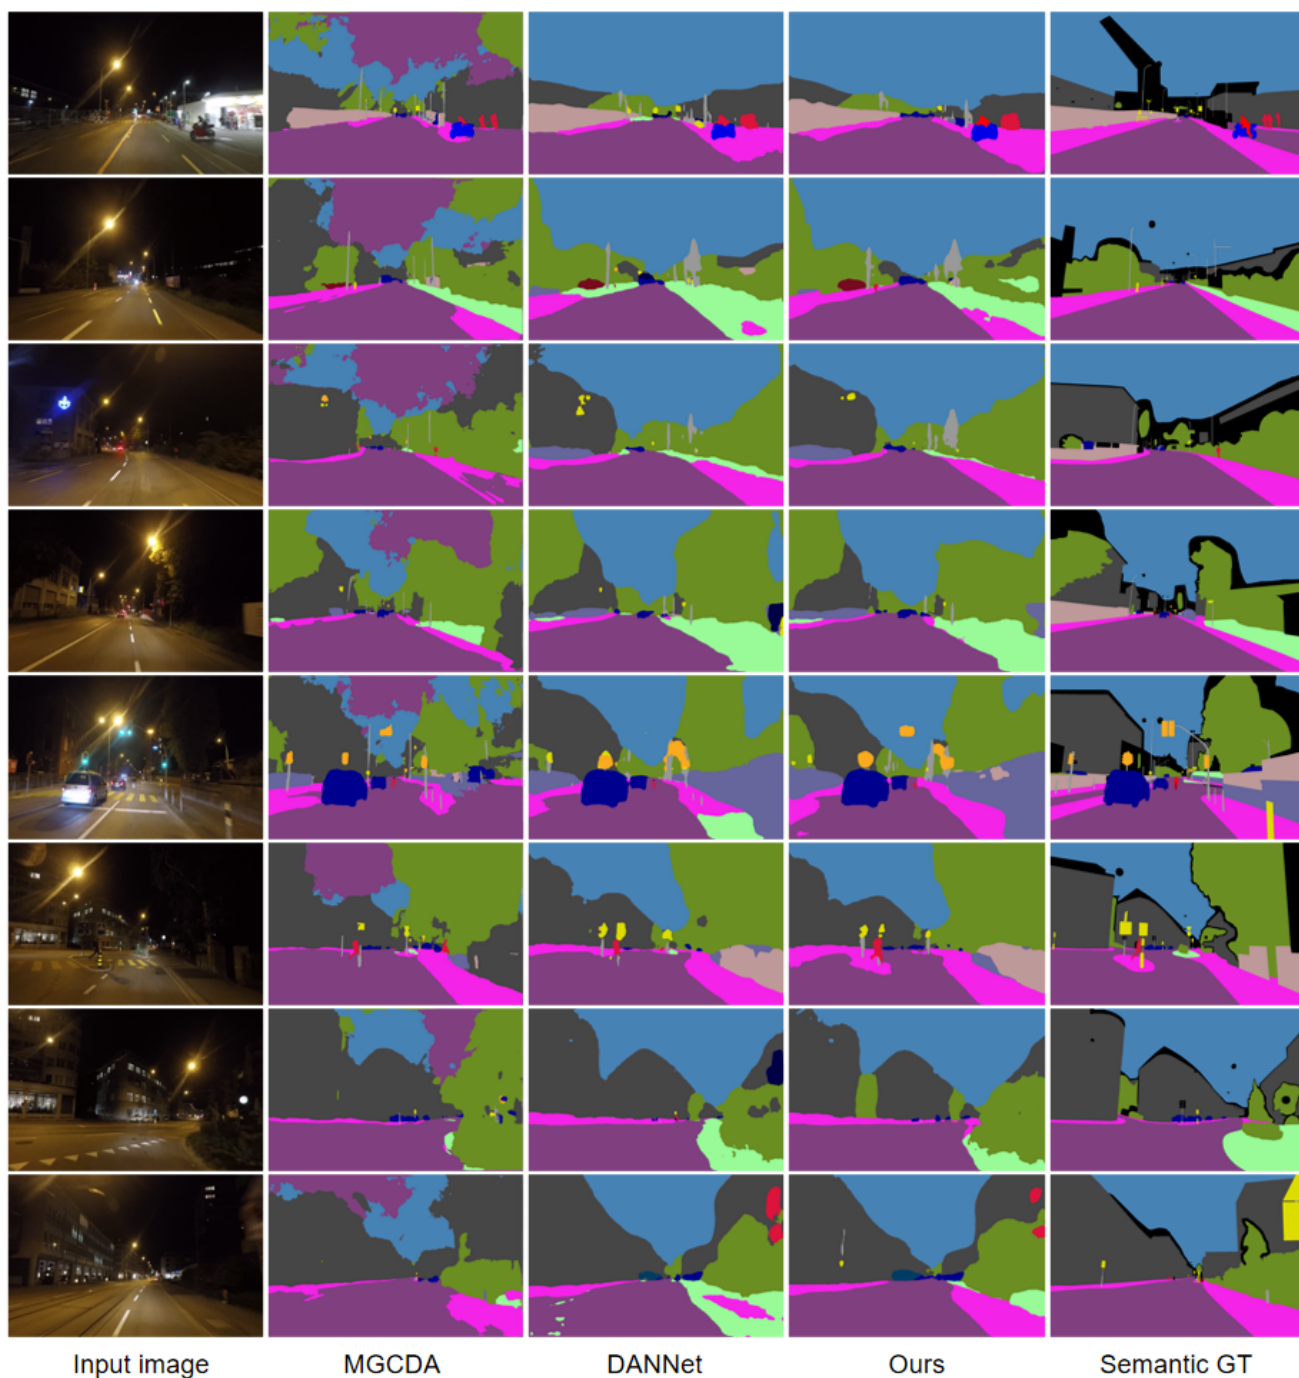

Figure 1. The qualitative comparison between our approach and some existing state-of-the-art methods on the Dark Zurich-val set.

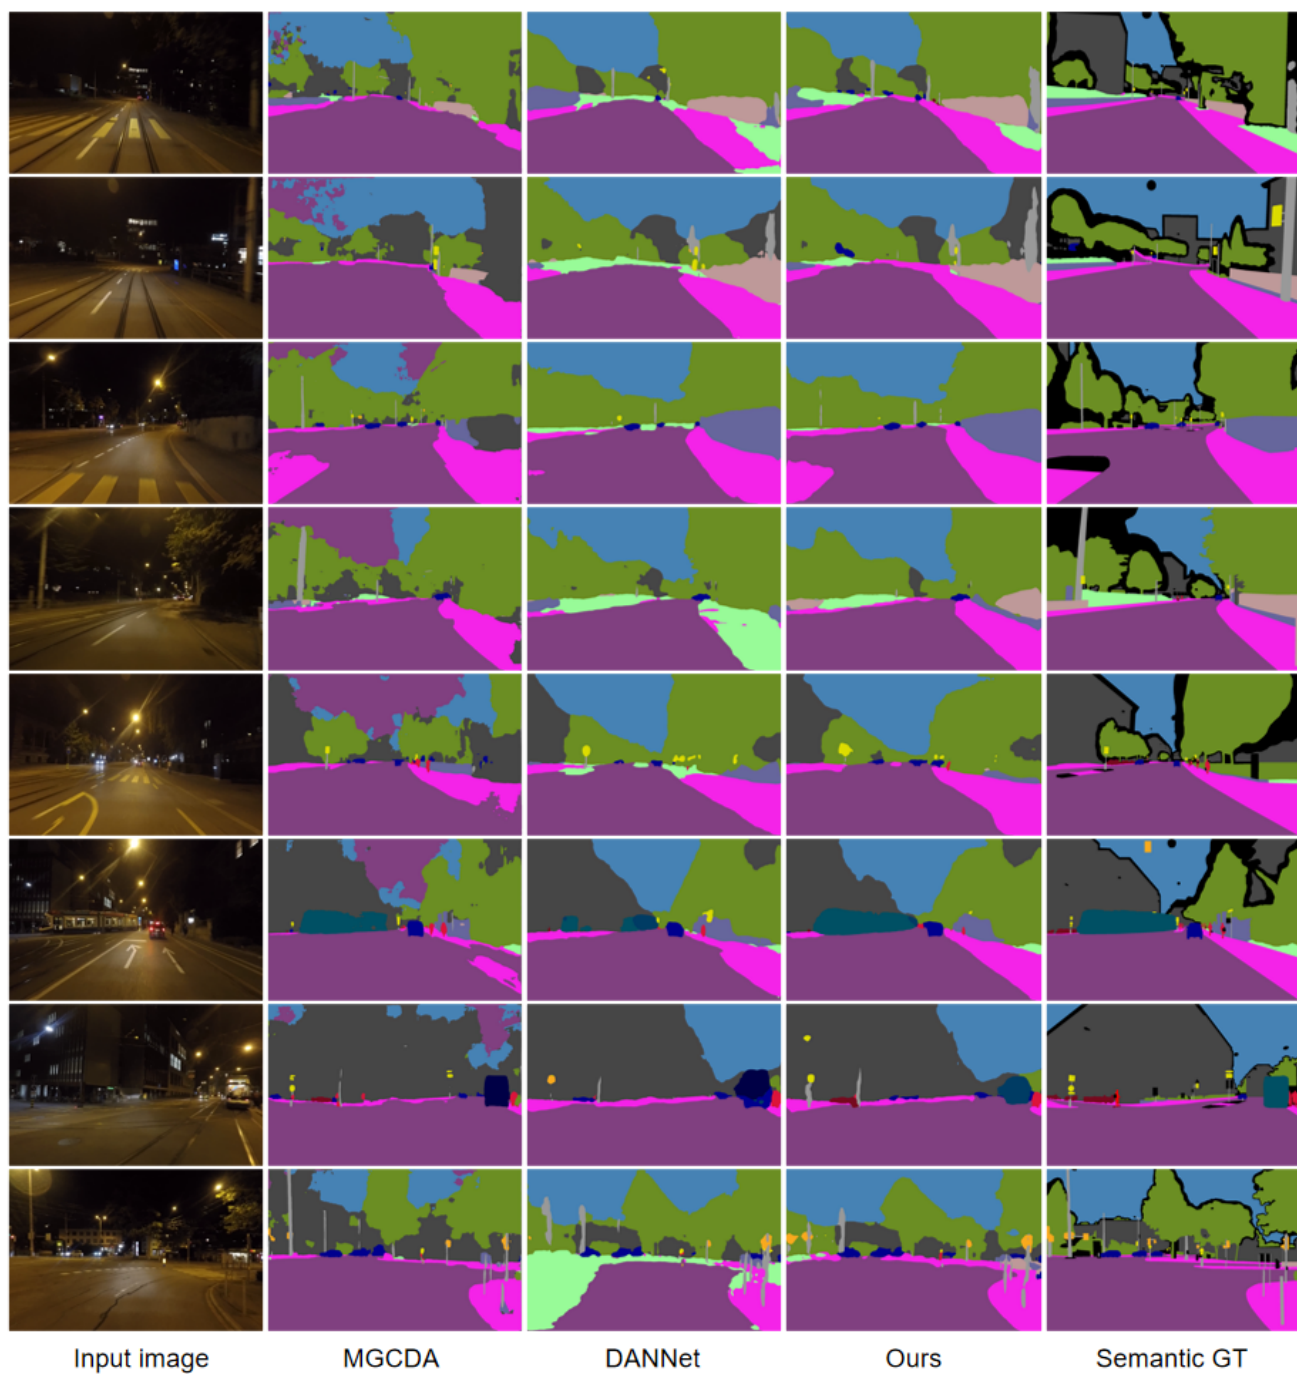

Figure 2. The qualitative comparison between our approach and some existing state-of-the-art methods on the ACDC-night-val set.

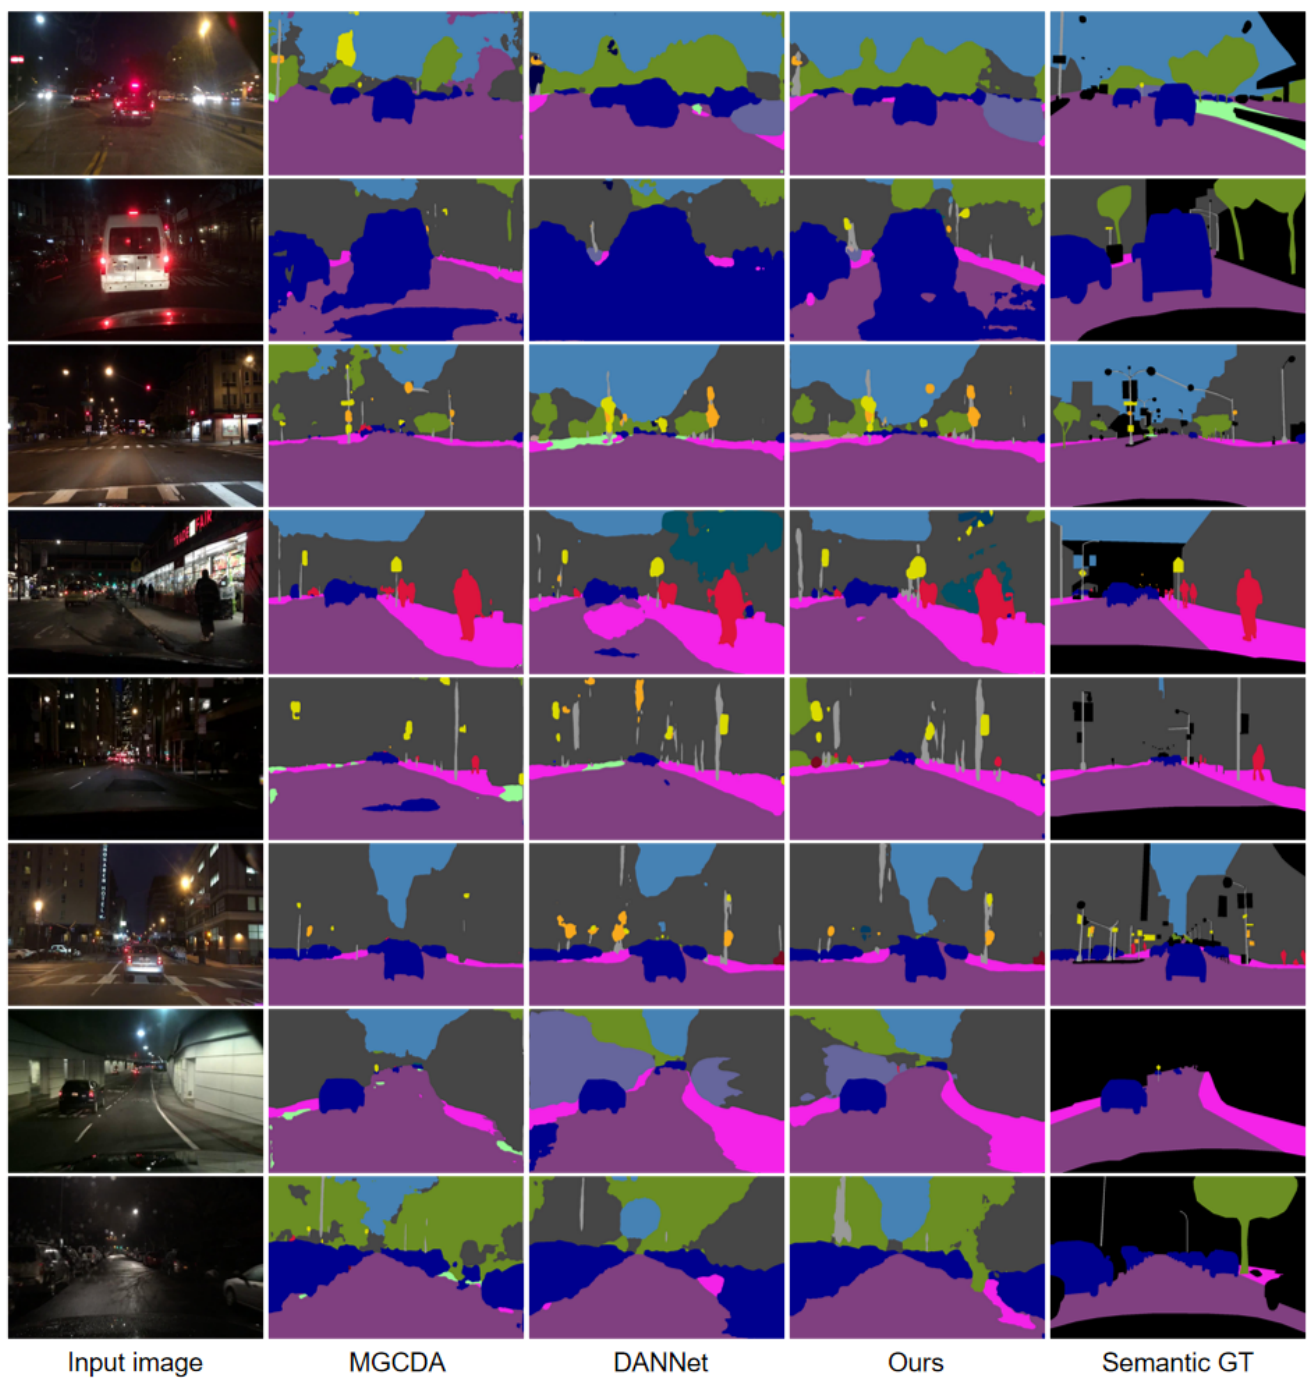

Figure 3. The qualitative comparison between our approach and some existing state-of-the-art methods on the BDD100K-night set.
